# Supplementary material
Source: Springer Nature journal article supplement (https://www.springermedizin.de/resource/supplementary/12943_2010_760_MOESM5_ESM.pdf/9554756)

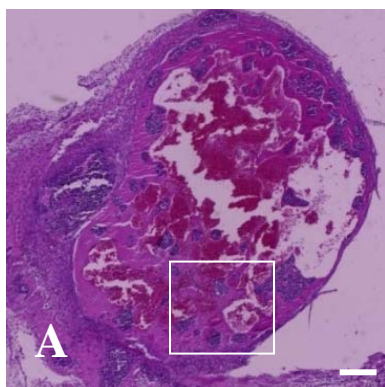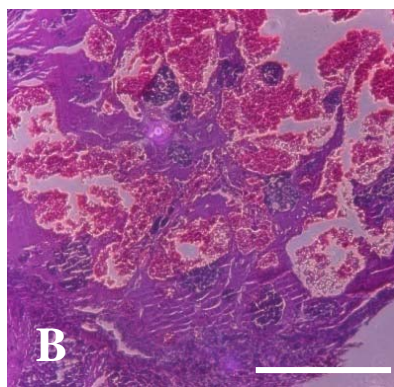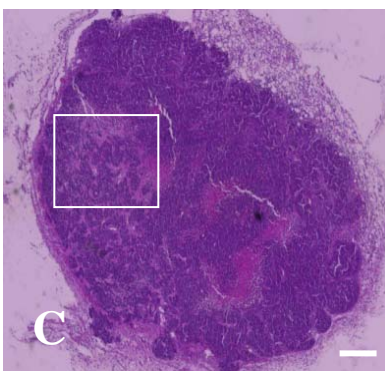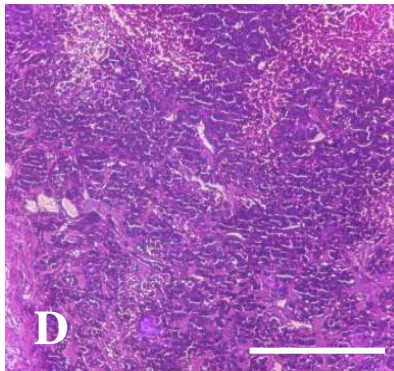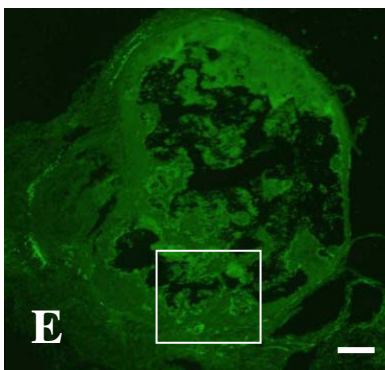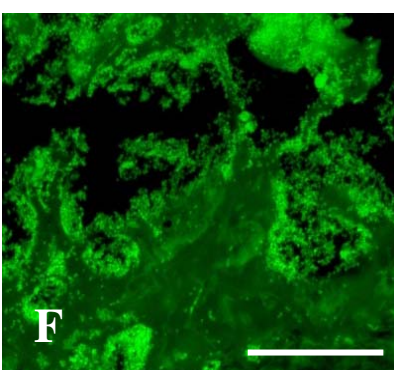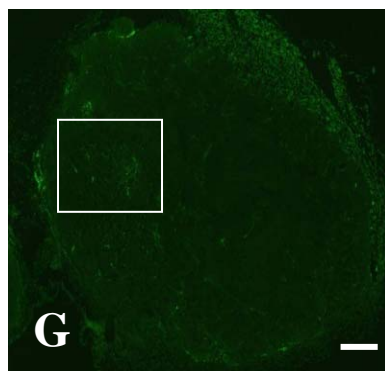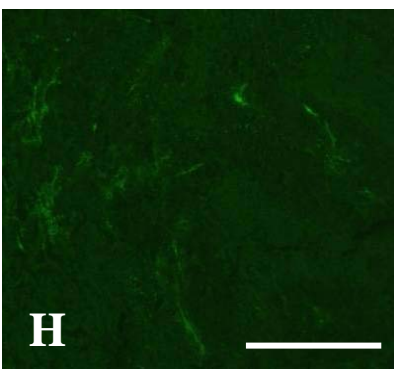

**I**

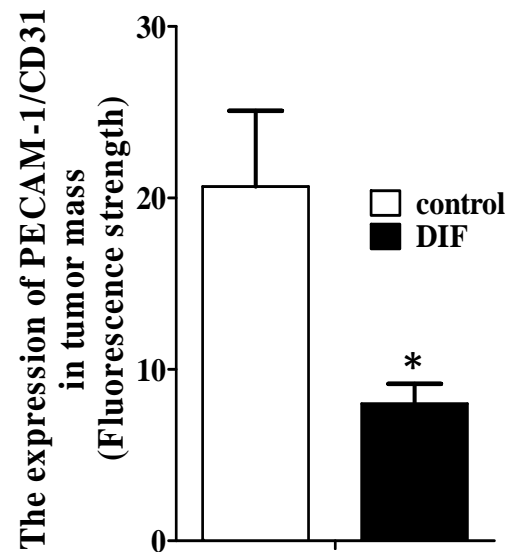

**J**

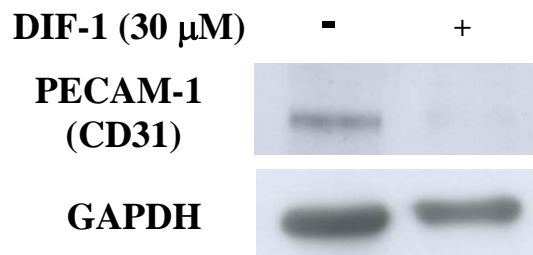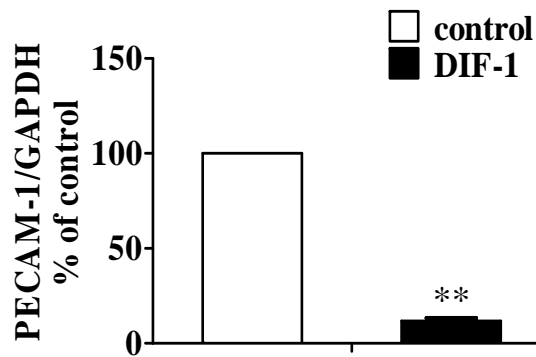

Supplement: MOESM5 [file 9554756]
